# Supplementary material for: Effects of Resveratrol on In Vivo Ovarian Cancer Cells Implanted on the Chorioallantoic Membrane (CAM) of a Chicken Embryo Model
Source: MDPI journal article supplement (doi:10.3390/ijms25084374), 2024-04-16

**Supplementary Figure S2.** Western Blot membranes showing proteins extracted from OVCAR-8 and SKOV-3 tumour implants. The OVCAR-8 cell lines are represented by six control tumour implants and eight tumour implants treated with resveratrol at 91.24  $\mu\text{g}$  (2 mM). Additionally, the SKOV-3 cell line data includes nine control tumour implants and eight tumour implants treated with resveratrol at 91.24  $\mu\text{g}$  (2 mM), C = control, and Res = Resveratrol.

### OVCAR-8 cell line

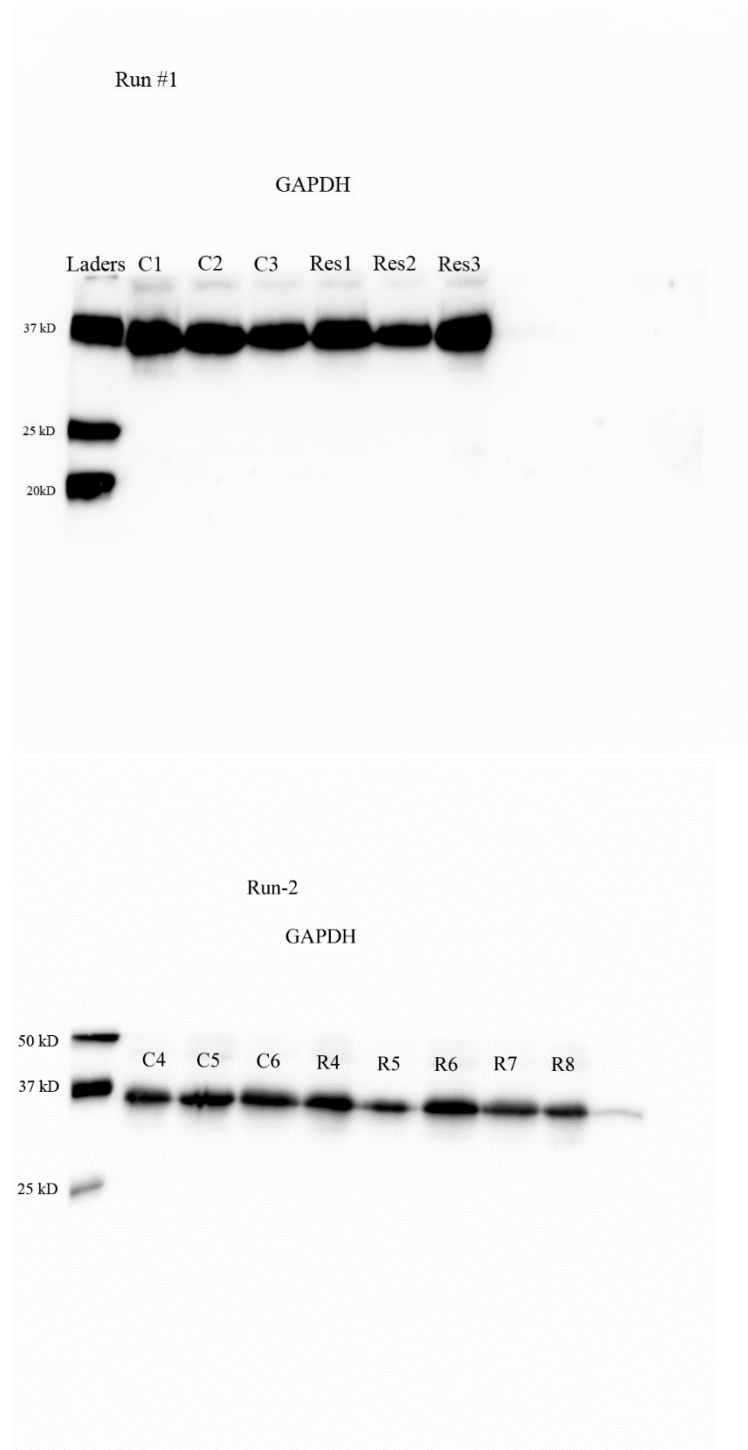

Run-1

NF-kB

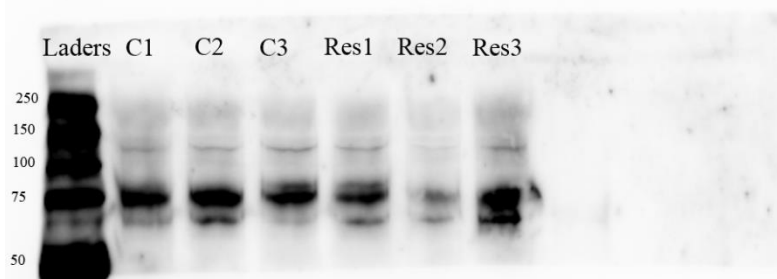

Run-2

NF-kB

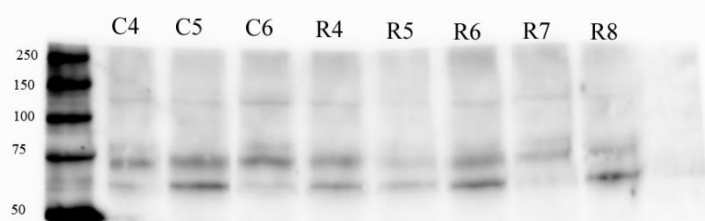

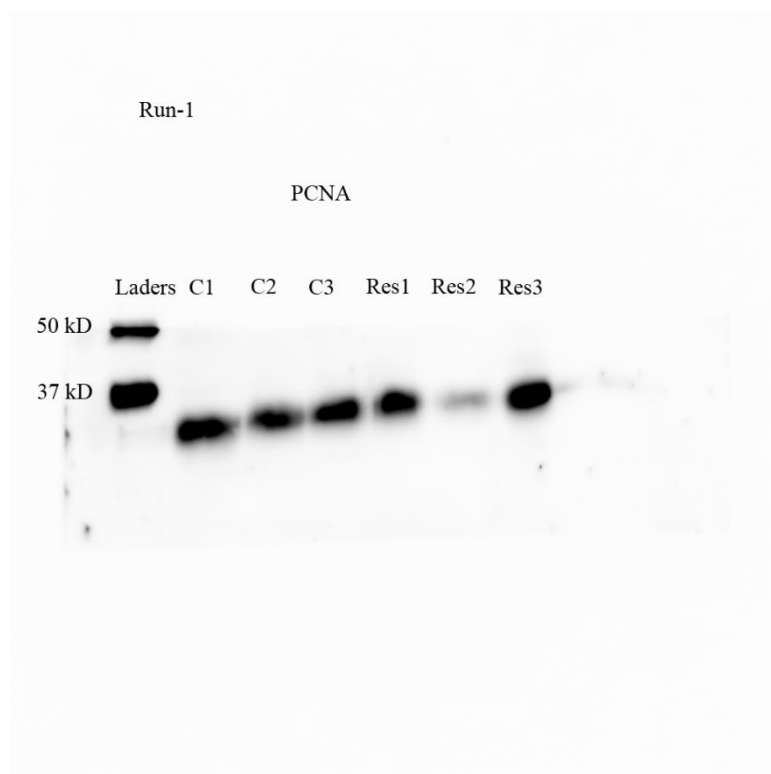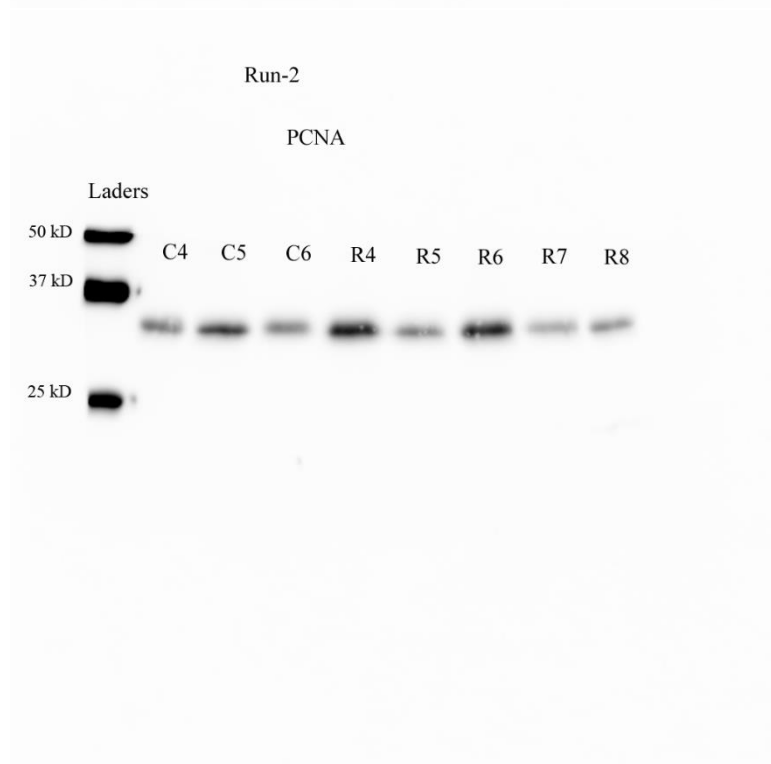

Run-1

pNF-kB

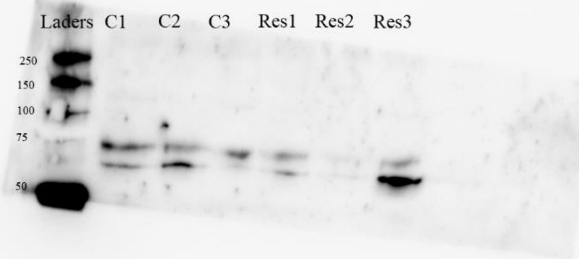

Run-2

pNF-kB

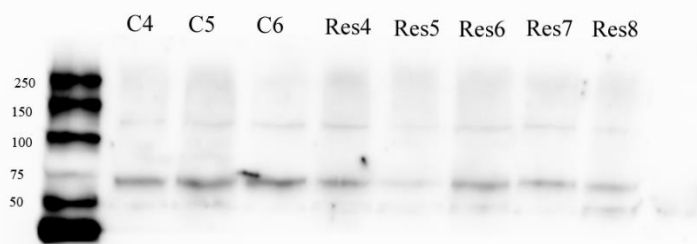

Run-1

SLUG

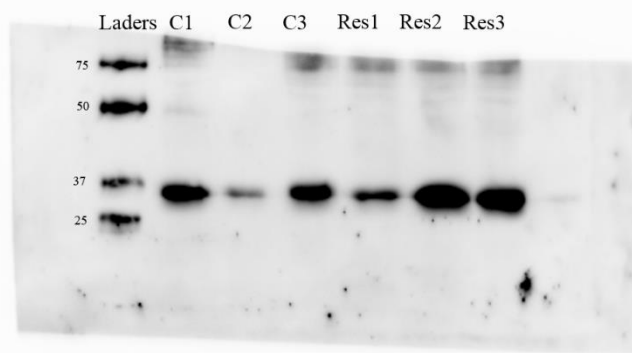

Run-2

SLUG

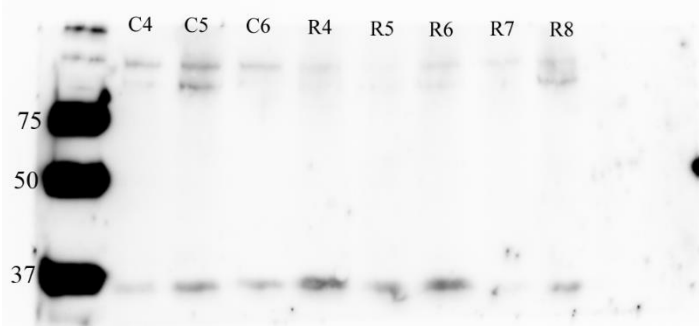

## SKOV-3

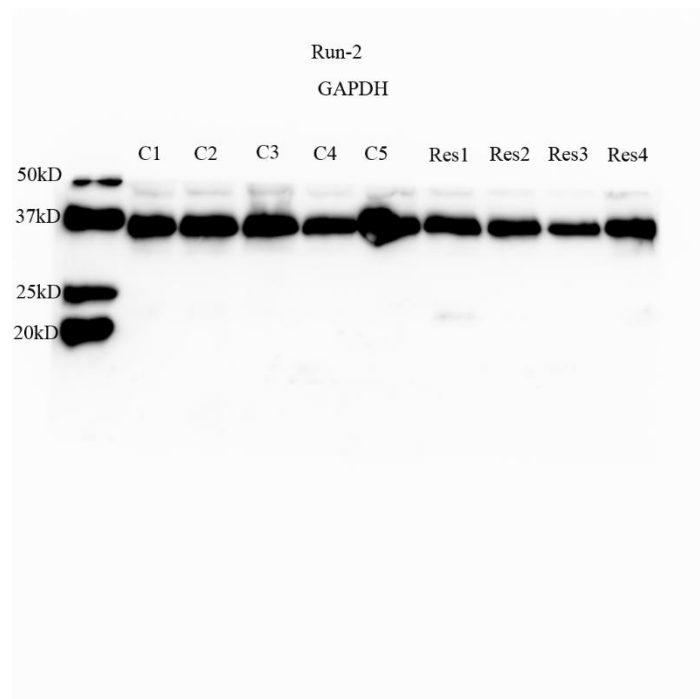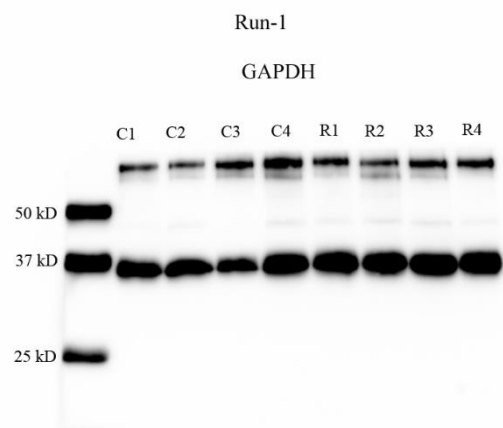

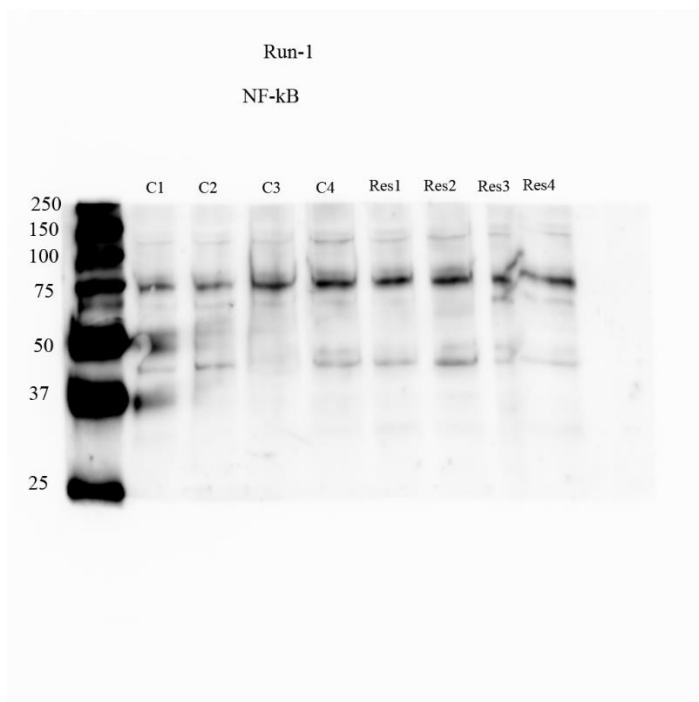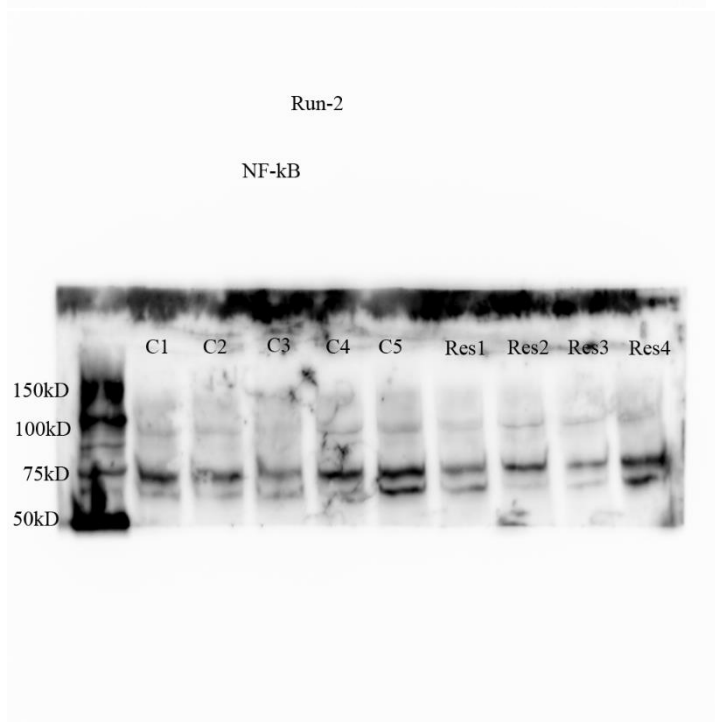

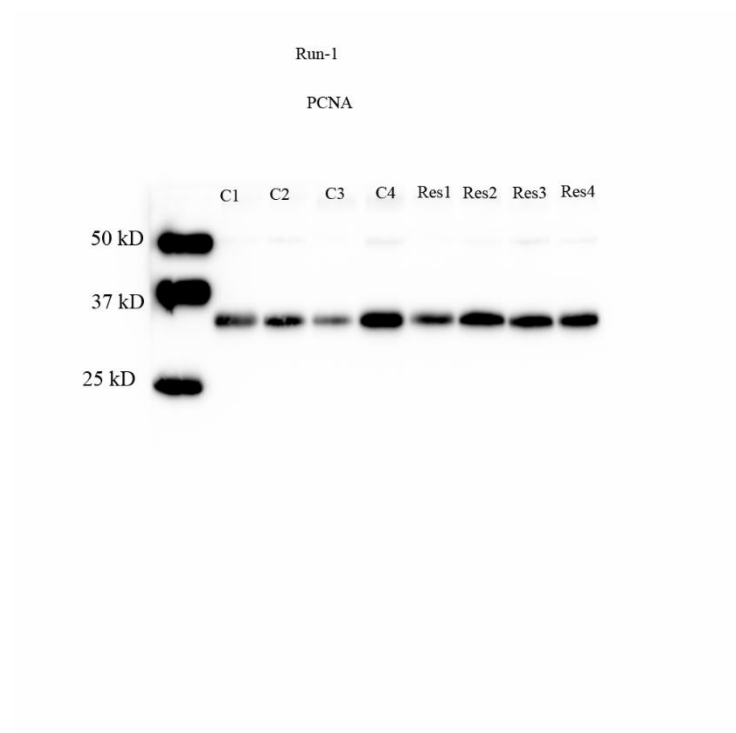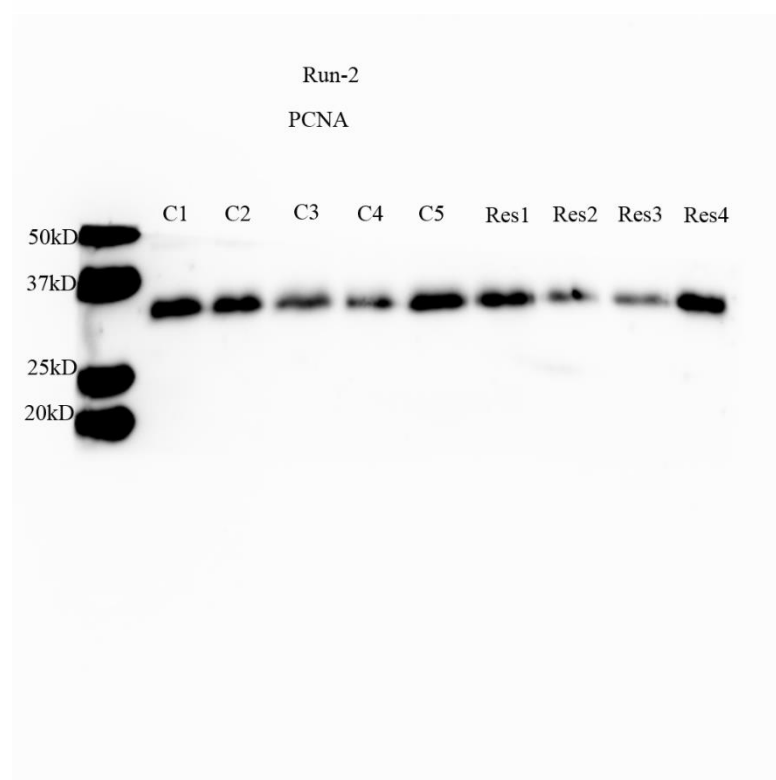



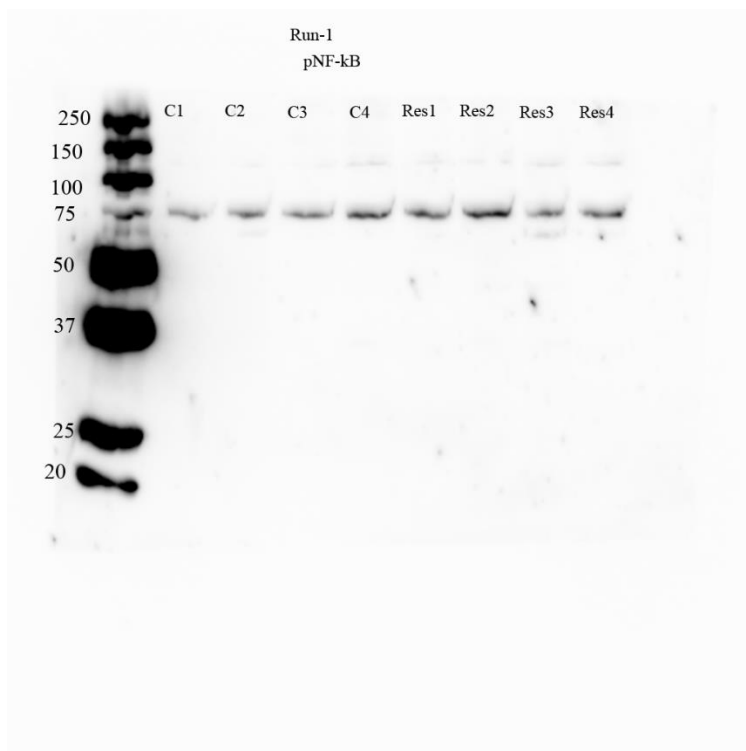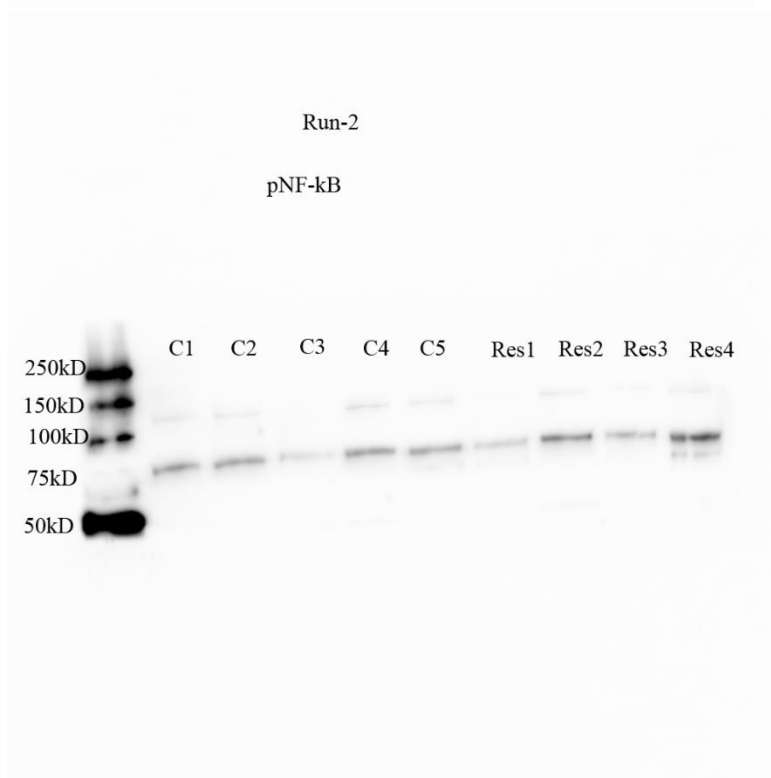

Run-1  
SLUG

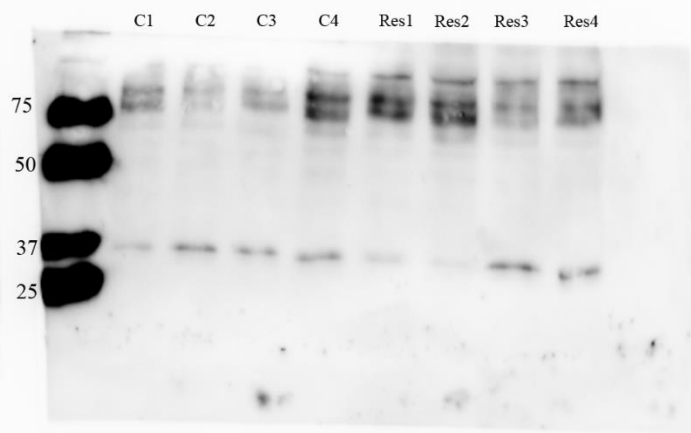

Run-2  
SLUG

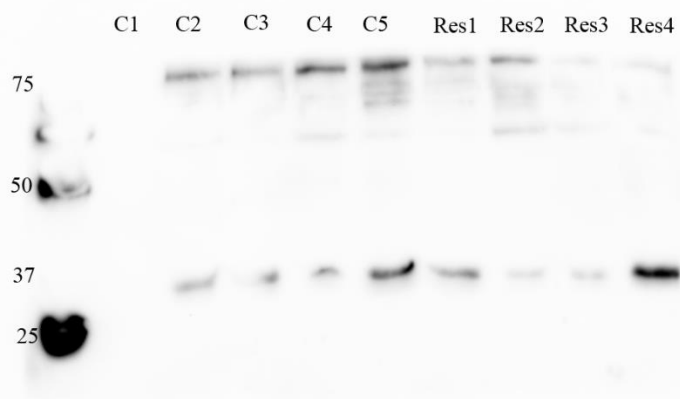

Supplement: s1 [file s1]
